# Supplementary material
Source: Springer Nature journal article supplement (https://www.springermedizin.de/resource/supplementary/12889_2012_5163_MOESM8_ESM.pdf/9494808)

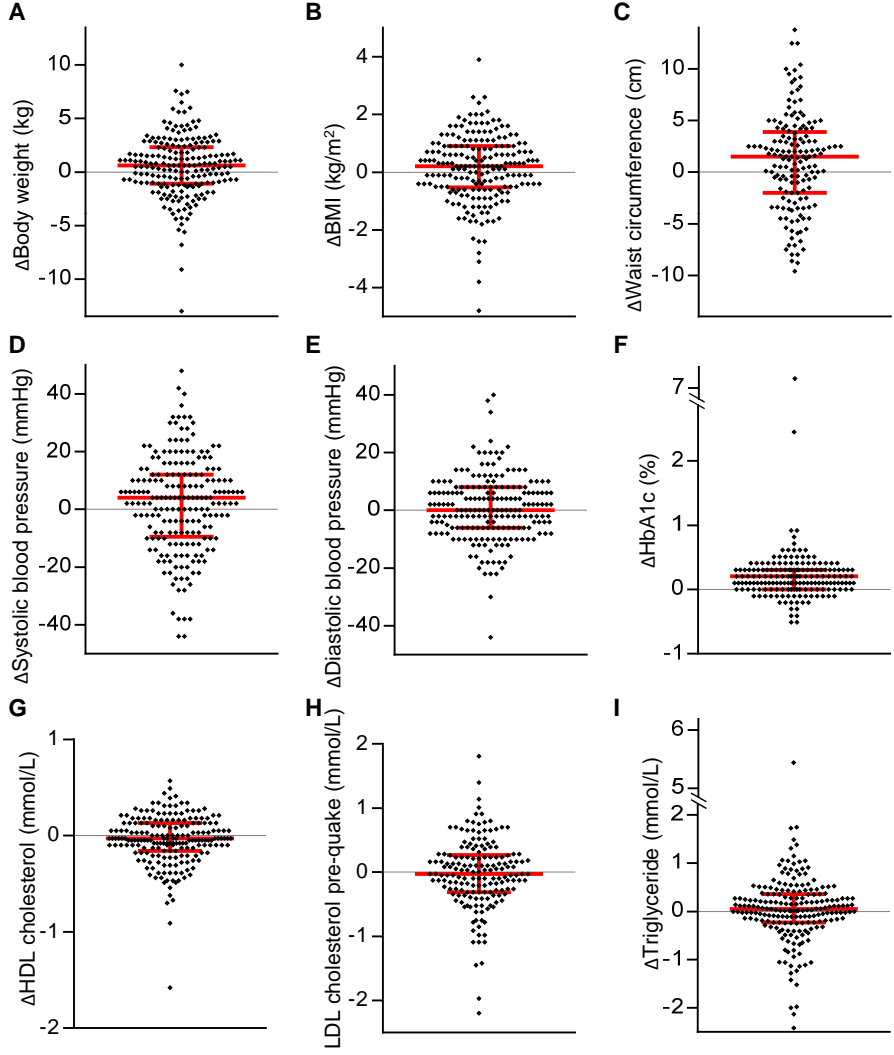

Supplement: MOESM8 [file 9494808]
